# Supplementary material
Source: bioRxiv or medRxiv preprint supplement (https://www.biorxiv.org/highwire/filestream/86123/field_highwire_adjunct_files/7/098178-16.pdf)

60 SNPs  
(8.37%)

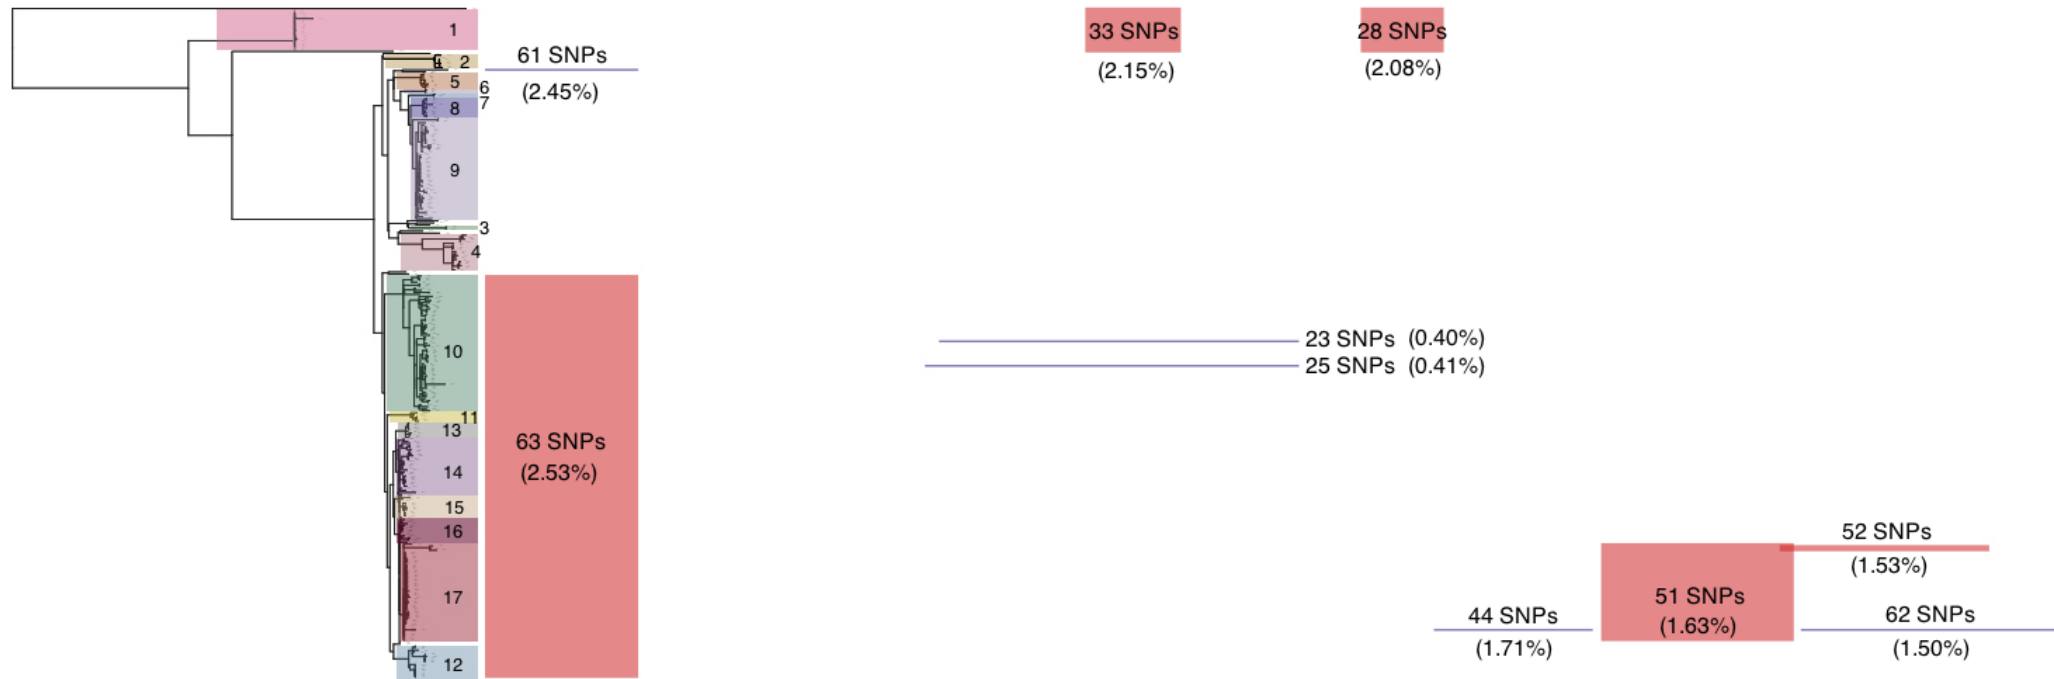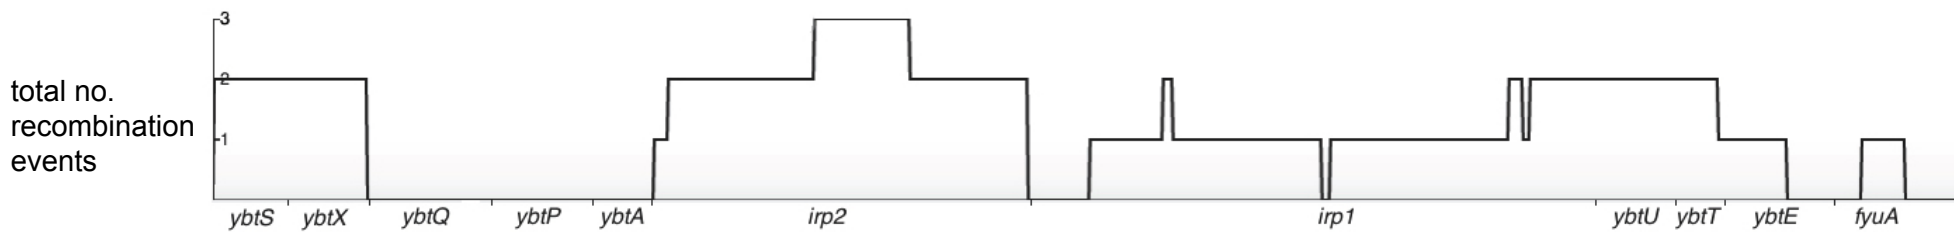

Supplement: Supplementary file [file 098178-16.pdf]
